# Supplementary material for: Crystal engineering with coordination compounds of 2,6-dicarboxy-4-hydroxypyridine and 9-aminoacridine fragments driven by different nature of the face-to-face π⋯π stacking
Source: Royal Society of Chemistry journal article supplement (doi:10.1039/c3ce41730a), 2013-11-07
Supplement: c3ce41730a.pdf [file c3ce41730a.pdf]

## Supporting information for manuscript

# Crystal engineering with coordination compounds of Ni<sup>II</sup>, Co<sup>II</sup>, Cr<sup>III</sup>, and Cd<sup>II</sup> bearing 2,6-dicarboxy-4-hydroxypyridine and 9-aminoacridine fragments driven by different nature of the face-to-face $\pi\cdots\pi$ stacking: X-ray structures, DFT calculations, and solution studies

Hossein Eshtiagh-Hosseini, Masoud Mirzaei,\* Sara Zarghami, Antonio Bauzá, Antonio Frontera\*, Joel T. Mague, Morteza Habibi and Mojtaba Shamsipur

### Table of contents:

1. TGA curves of 1 and 2
2. Cartesian coordinates of optimized complexes 1-4

### 1. TGA curves:

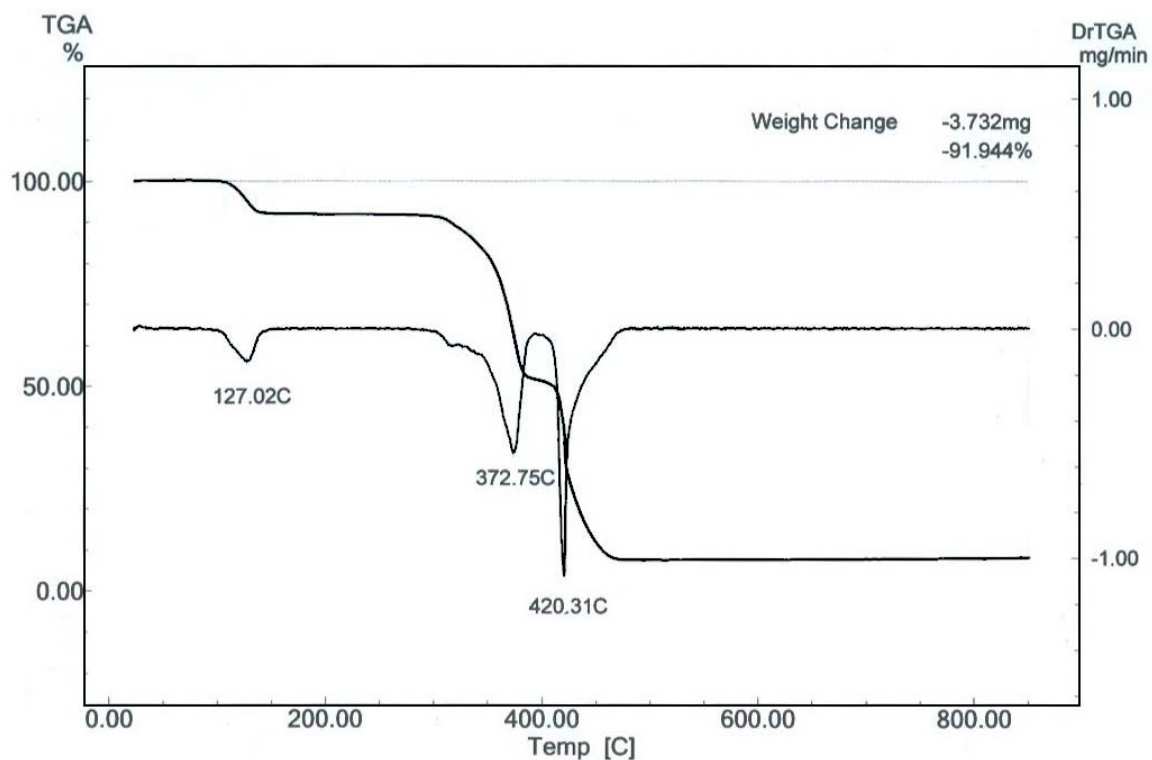

Fig. S1. TGA curve of 1.

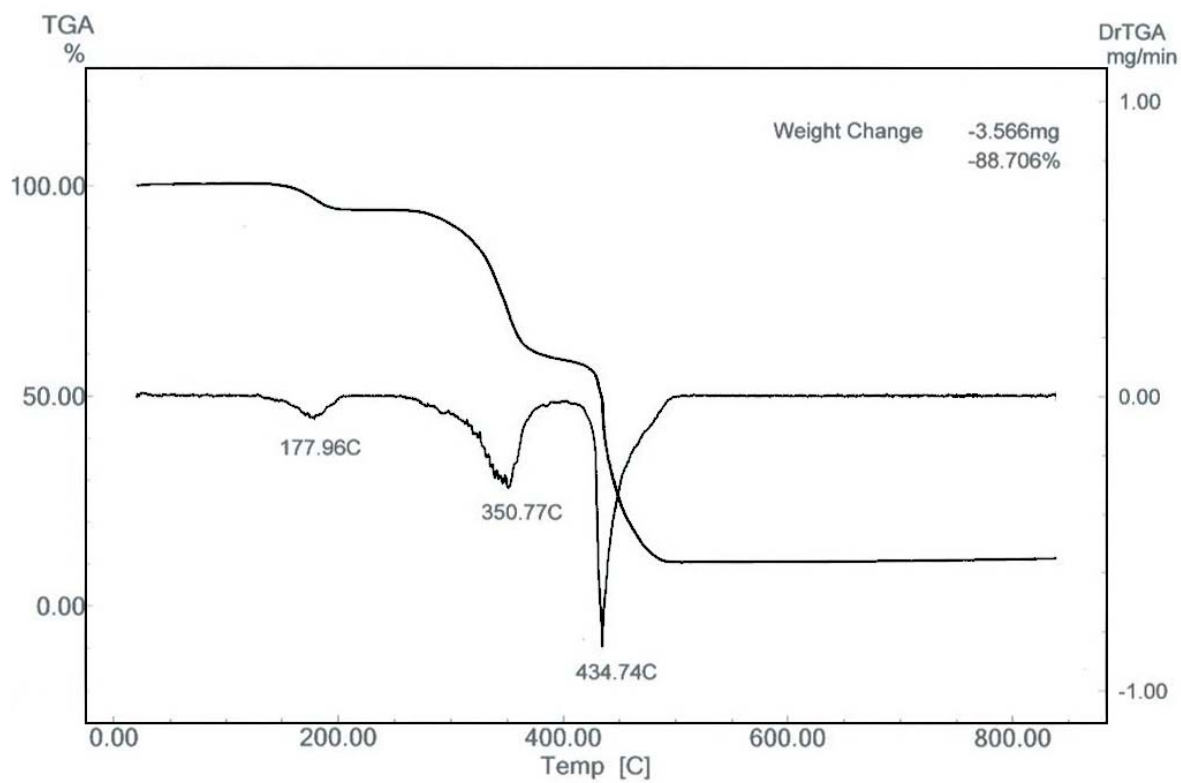

Fig. S2. TGA curve of 2.

## 2. Cartesian coordinates

### 1.

|    |            |            |            |
|----|------------|------------|------------|
| Ni | 0.0037678  | 0.0462915  | 0.0505967  |
| O  | 1.7339048  | 1.2107494  | -0.6451381 |
| O  | 2.1771725  | 2.9714497  | -2.0237519 |
| O  | -2.1055158 | -0.4854389 | 0.2618737  |
| O  | -4.1412537 | 0.1869043  | -0.5072702 |
| O  | -2.6766536 | 4.0464271  | -3.6475459 |
| H  | -1.9830721 | 4.6038347  | -4.0435070 |
| O  | 0.0540089  | 0.9962930  | 2.0377234  |
| O  | 0.7367111  | 0.5088648  | 4.1575503  |
| O  | 0.3451603  | -1.5158586 | -1.4348369 |
| O  | 1.1908501  | -3.6268296 | -1.5576951 |
| O  | 2.5287925  | -4.3463226 | 3.3993058  |
| H  | 2.5925655  | -4.0285537 | 4.3176792  |
| N  | -0.8501743 | 1.3786254  | -1.0809432 |
| N  | 0.8375560  | -1.3402204 | 1.1313289  |
| C  | 1.4220448  | 2.1510264  | -1.4517283 |
| C  | -0.0830936 | 2.2609392  | -1.7360217 |
| C  | -0.6539261 | 3.1815567  | -2.6110934 |
| H  | 0.0079149  | 3.8821013  | -3.1279915 |
| C  | -2.0417975 | 3.1622467  | -2.7893252 |
| C  | -2.8255367 | 2.2343120  | -2.0967932 |
| H  | -3.9079332 | 2.1811317  | -2.2069811 |
| C  | -2.1825455 | 1.3429364  | -1.2396483 |
| C  | -2.8941499 | 0.2514299  | -0.4245826 |
| C  | 0.5674250  | 0.2544654  | 2.9419312  |
| C  | 1.0254057  | -1.1224823 | 2.4401402  |
| C  | 1.5926312  | -2.1069982 | 3.2457294  |
| H  | 1.7280885  | -1.8897629 | 4.3088140  |
| C  | 1.9592955  | -3.3229016 | 2.6576633  |
| C  | 1.7540673  | -3.5316624 | 1.2906823  |
| H  | 2.0214917  | -4.4620574 | 0.7912726  |
| C  | 1.1813923  | -2.5000099 | 0.5495689  |
| C  | 0.8854058  | -2.5724869 | -0.9570062 |
